# Supplementary material for: Porous Si@C ball-in-ball hollow spheres for lithium-ion capacitors with improved energy and power densities
Source: Royal Society of Chemistry journal article supplement (doi:10.1039/c8ta07576j), 2018-01-01
Supplement: c8ta07576j1.pdf [file c8ta07576j1.pdf]

## Supporting information

### **Porous Si@C Ball-in-Ball Hollow Spheres for Lithium-ion Capacitor with improved energy and power density**

*Bo Li,<sup>a</sup> Shixiong Li,<sup>a</sup> Ying Jin,<sup>b</sup> Jiantao Zai<sup>\*a</sup>, Ming Chen,<sup>a</sup> Ali Nazakat,<sup>a</sup> Peng Zhan,<sup>b</sup> Yong Huang,<sup>a</sup> and Xuefeng Qian<sup>\*a</sup>*

- <sup>a</sup> Shanghai Electrochemical Energy Devices Research Center, School of Chemistry and Chemical Engineering and State Key Laboratory of Metal Matrix Composites, Shanghai Jiao Tong University, Shanghai 200240, China
- <sup>b</sup> ZhongTian Emerging Materials Co. LTD, Nantong, 226000, China
- Email: xfqian@sjtu.edu.cn, zaijiantao@sjtu.edu.cn

### **Experimental**

All Chemical reagents were purchased from Shanghai Chemical Co. Ltd., and they were directly used without further purification.

#### Materials Preparations

**MHSiO<sub>2</sub>**: The preparation of MHSiO<sub>2</sub> was following a procedure reported in the literature. Typically, cetyltrimethylammonium bromide (CTAB, 0.3 g) was dissolved in ethanol aqueous solution (60 mL C<sub>2</sub>H<sub>5</sub>OH/100 mL H<sub>2</sub>O) containing concentrated ammonia aqueous solution (2 mL, 25 wt%). Then, tetraethoxysilane (TEOS, 2 mL) was rapidly added to the mixture under vigorous stirring. After stirring at 35 °C for 24 h, the white precipitation was collected by centrifugation and washed with ethanol. Then, the product was dispersed in water and kept at 90 °C for 2 h. The product collected by centrifugation was dispersed into an ethanol solution (240 mL) containing concentrated HCl (480 μL, 37%) and stirred at 60 °C for 3 h, generating the template-free MHSiO<sub>2</sub>.

**MHSiO<sub>2</sub>@Al<sub>2</sub>O<sub>3</sub>:** MHSiO<sub>2</sub>@Al<sub>2</sub>O<sub>3</sub> nanospheres were prepared by a facile synthetic protocol in a buffer solution. In a typical synthesis, 0.63 g of ammonium formate was dispersed in 200 ml deionized water, and then formic acid was added till the pH value to 4.4. Then 0.1 g of MHSiO<sub>2</sub> and 0.3 g aluminum sulfate were added and dispersed by ultrasound treatment for 30 min. The solution was kept at 70 °C for 2 h under vigorously stirring. The resulted core-shell NPs were collected by centrifugation, washed with water and ethanol, and dried at 80 °C for 4 h.

**MHSiO<sub>2</sub>@Al<sub>2</sub>O<sub>3</sub>@C:** Carbon coating of MHSiO<sub>2</sub>@Al<sub>2</sub>O<sub>3</sub> was carried out by thermal decomposition of acetylene gas at 800 °C for 10min in a quartz furnace. The mixture of acetylene and high-purity argon (argon: acetylene = 9: 1 by volume) was introduced at a flow rate of 150 sccm.

**SiO<sub>2</sub>@C ball-in-ball hollow spheres:** The obtained MHSiO<sub>2</sub>@Al<sub>2</sub>O<sub>3</sub>@C was then immersed in a 1 M HCl solution for 6 h to remove Al<sub>2</sub>O<sub>3</sub>. Finally, the resulted powders were collected by filtration and washed with water for several times and vacuum-dried at 70 °C for 6 h.

**Porous Si@C ball-in-ball hollow spheres:** Magnesium powder (0.3 g) was mixed with MHSiO<sub>2</sub>@void@C (0.3 g) by grinding. The mixture was then heated in a tube furnace at 650 °C for 5 h under an argon atmosphere containing 5 vol% H<sub>2</sub>. The ramp rate was kept at 1 °C min<sup>-1</sup>. The obtained powder was then immersed in a 2 M HCl solution for 6 h to remove MgO and. Finally, the resulted powders were collected by filtration and washed with water for several times and vacuum-dried at 70 °C for 4 h.

**MHSi@SiC@C:** The preparation process of Si@SiC@C is similar to the method of Si@void@C, except for the addition of void space between SiO<sub>2</sub> and carbon.

**RAC:** The RHs were firstly leached with a 10% HCl solution to remove the metal ions impurities. The leached RHs were heated to 700 °C, and then maintained at 700 °C for 2 h in a tube furnace under the protection of nitrogen to obtain carbonized RHs (CRHs). CRHs were mixed with KOH in a 1:5 mass ratio. The mixture was then transferred to ceramic boats and heated to 700 °C at a ramp rate of 2 °C min<sup>-1</sup>, and then maintained at 700 °C for 1 h in a tube furnace under nitrogen. The resultant activation products were filtered and washed with water until the filtrate became neutral. Finally, the RACs were dried at 90 °C for 10h.

#### Characterization

X-ray diffraction (XRD) patterns were recorded on a D/max 2550VL/PC X-ray diffractometer (Rigaku, Japan) equipped with Cu K $\alpha$  radiation ( $\lambda = 1.5418 \text{ \AA}$ , 40 kV, 30 mA). Raman spectra were acquired using an inVia-reflex micro-Raman spectrometer (Renishaw, UK) with a 532 nm wavelength incident laser. X-ray photoelectron spectroscopy (XPS) was performed on an AXIS Ultra DLD spectrometer (Kratos, Japan) with Al K $\alpha$  radiation ( $h\nu = 1486.6 \text{ eV}$ ). Thermogravimetric analysis (TGA) was performed on an SDT Q600 thermoanalyzer (DSC-TGA, TA, USA) in air. The specific surface area and pore size distribution of materials were measured using a NOVA2200e analyzer (Quantachrome, USA). The morphology of samples was observed using a NOVA NanoSEM 230 field-emission scanning electron microscope

(FESEM, FEI, USA). The microstructure of samples was characterized using a JEM-2100F transmission electron microscope (TEM, JEOL, Japan) operating at 200 kV.

#### Electrochemical measurements

The electrochemical experiments were performed using CR2016 coin cells, which were assembled in a glove box filled with ultra-high purity argon. For half-cell testing, Si/C and RAC electrodes were used as working electrodes and Li metal as the reference electrode. The Si/C electrodes were prepared by casting a slurry consisting of 70 wt% of active material, 15 wt% poly(acrylic acid) (PAA) binder, and 15 wt% of Super-P carbon black on Cu foil. The RAC electrodes were prepared by mixing 80 wt% of active material, 10 wt% Cellulose Sodium (CMC) binder, and 10 wt% of Super-P carbon black on Al foil. The typical mass loading of the active materials in cathode and anode are 2 mg and 1 mg, respectively. 1 M  $\text{LiPF}_6$  in a mixture of ethylene carbonate, dimethyl carbonate (EC/DEC, 1:1 by vol%) and 10 wt% fluoroethylene carbonate (FEC) was used as the electrolyte. The Si/C||RAC LICs were also assembly in coin cells with Si/C anode (pre-cycled for 3 cycles at  $0.4 \text{ A g}^{-1}$ ) and RAC cathode in the same electrolyte, and the optimized mass ratio of anode and cathode was 1:7. The galvanostatic charge and discharge experiment were performed on a battery tester LAND-CT2001A at room temperature. The voltage range of Si/C electrode was 0.01-1.5 V, and the cell is conducted at a low current density of  $0.4 \text{ A g}^{-1}$  in the first cycle to activate the anode materials. The RAC electrodes and the Si/C||RAC LICs were measured at the same voltage range of 2.0-4.0 V. Cyclicvoltammetry (CV) was conducted on an electrochemical workstation. Electrochemical impedance spectroscopy (EIS)

measurements were performed on a ZAHNER Zennium electrochemical workstation.

The energy density (E) and power density (P) were calculated from the galvanostatic charge/discharge curve by the equation

$$E = \int_{t_2}^{t_1} IV dt$$

(I)

Where E (W h kg<sup>-1</sup>) is energy density, I is the constant current density (A g<sup>-1</sup>), V is the voltage, and t<sub>i</sub>, t<sub>2</sub> is the start time and end time in the discharge process, respectively.

$$P = \frac{E}{\Delta t}$$

(II)

Where P (W g<sup>-1</sup>) is power density,  $\Delta t$  is discharge time (s). The mass includes both anode and cathode active materials.

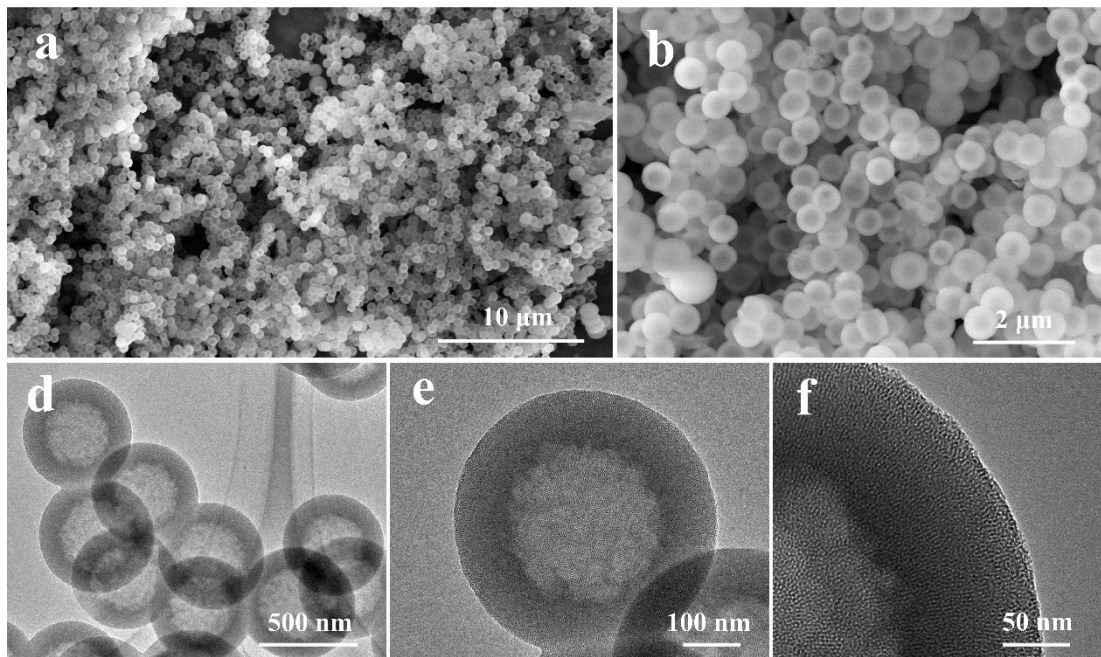

**Figure S1.** SEM images of (a), (b) TEM images of (d), (e) and (f) SiO<sub>2</sub>

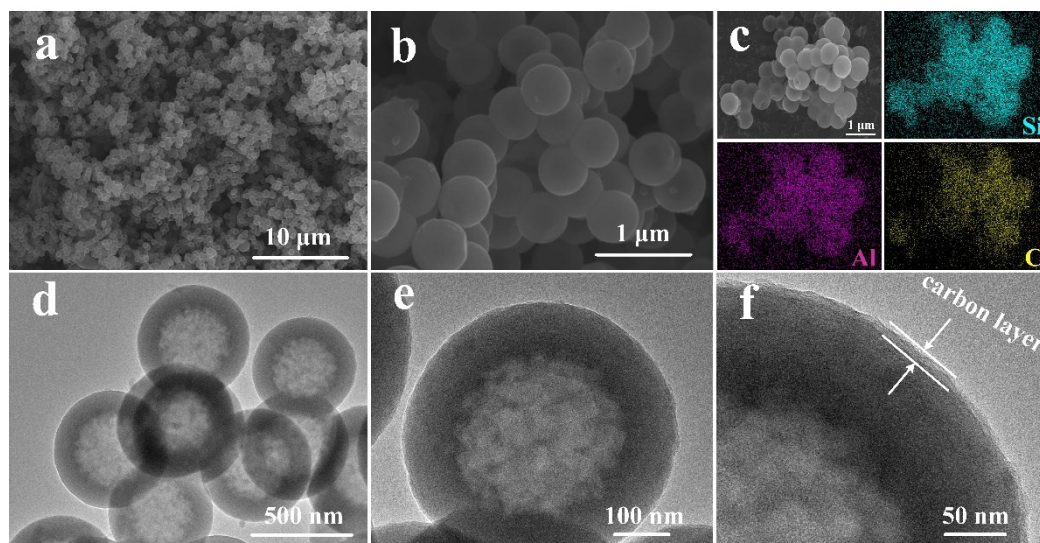

**Figure S2.** SEM images of SiO<sub>2</sub>@Al<sub>2</sub>O<sub>3</sub>@C (a) and (b). (c) SEM image of SiO<sub>2</sub>@Al<sub>2</sub>O<sub>3</sub>@C and corresponding EDX elemental mapping images of Si (blue), Al (purple) and C (yellow). TEM images of SiO<sub>2</sub>@Al<sub>2</sub>O<sub>3</sub>@C (d), (e) and (f) Magnified TEM images of SiO<sub>2</sub>@Al<sub>2</sub>O<sub>3</sub>@C.

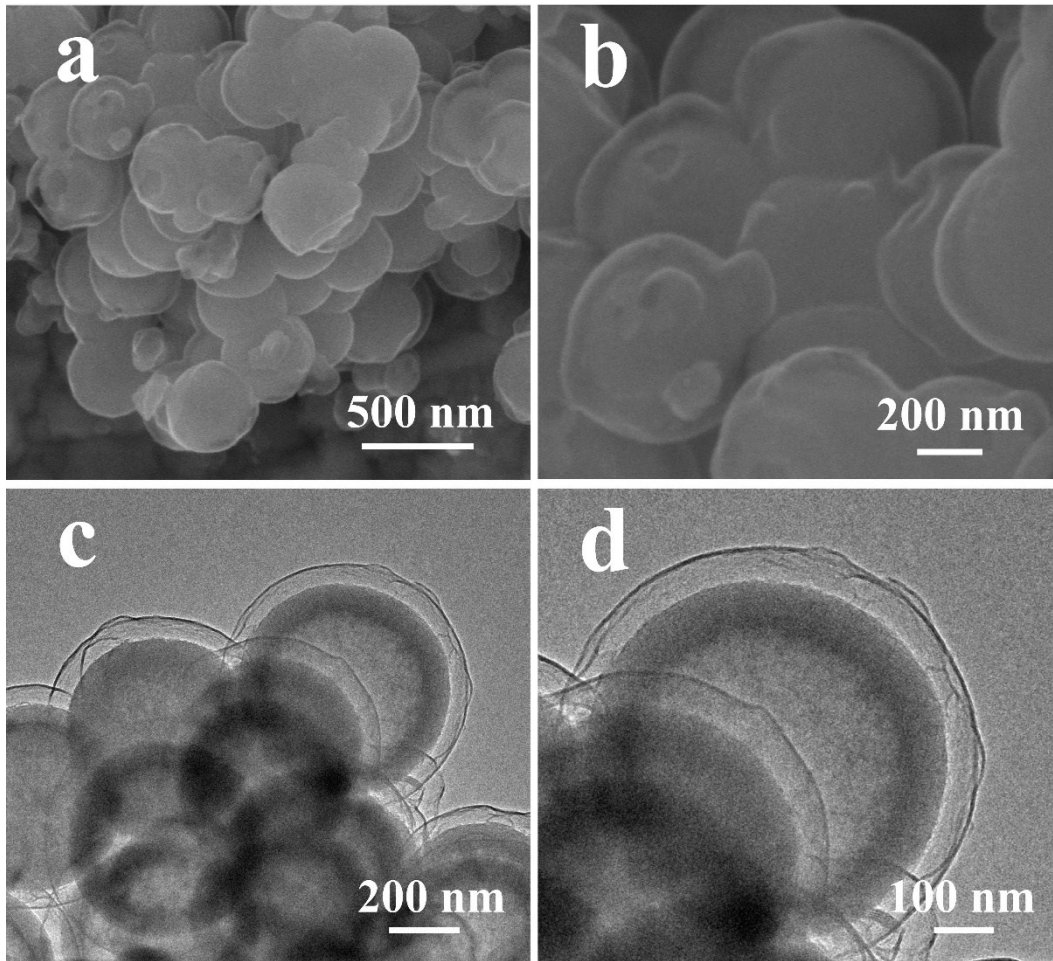

**Figure S3.** SEM images (a) and (b), and TEM images of (c) and (d) of SiO<sub>2</sub>@C ball-in-ball hollow spheres.



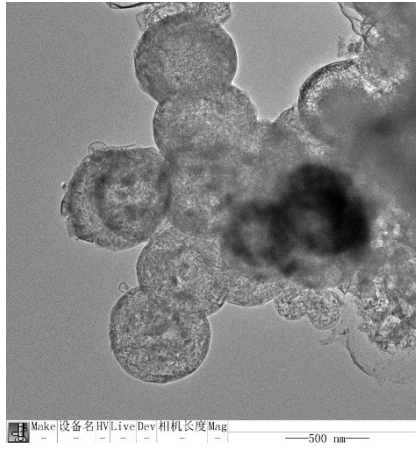

**Figure S4.** TEM image of Si@SiC@C.

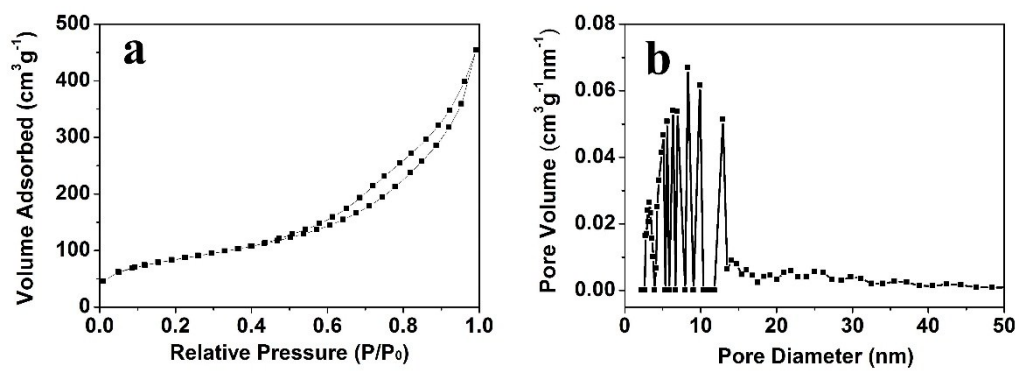

**Figure S5.** (a) Nitrogen adsorption/desorption isotherms obtained at 77 K and (b) pore size distribution of Si@C ball-in-ball hollow spheres.

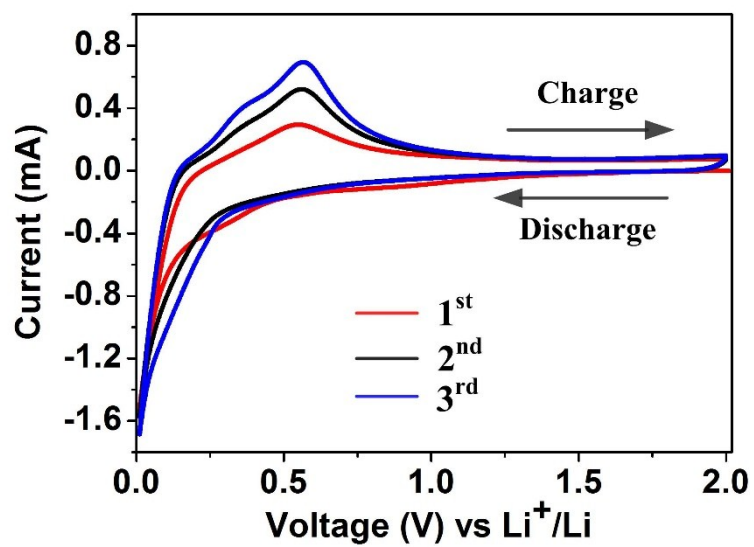

**Figure S6.** CV curves of Si@C ball-in-ball hollow spheres.

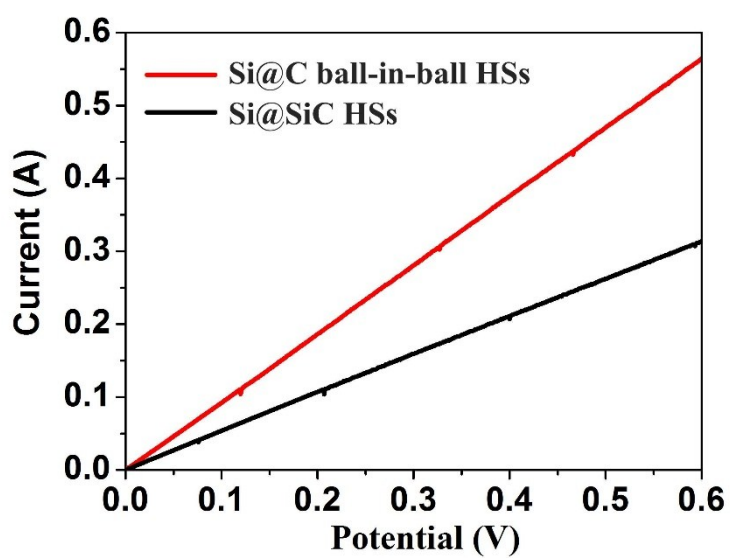

**Figure S7.** Conductivity of Si@C ball-in-ball hollow spheres and Si@SiC hollow spheres.

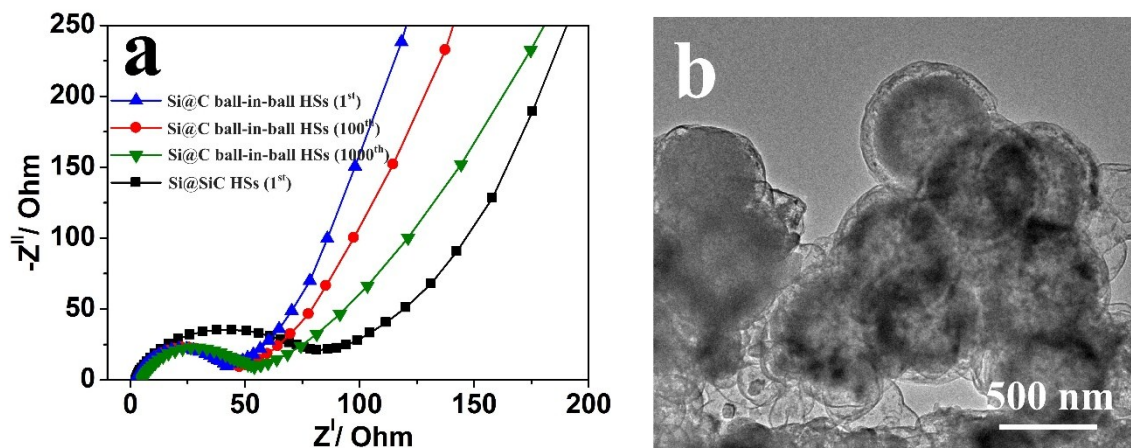

**Figure S8.** (a) Nyquist plots of Si@C ball-in-ball hollow spheres and Si@SiC@C hollow spheres.

(b) TEM image of Si@C ball-in-ball hollow spheres after 1000 cycles.

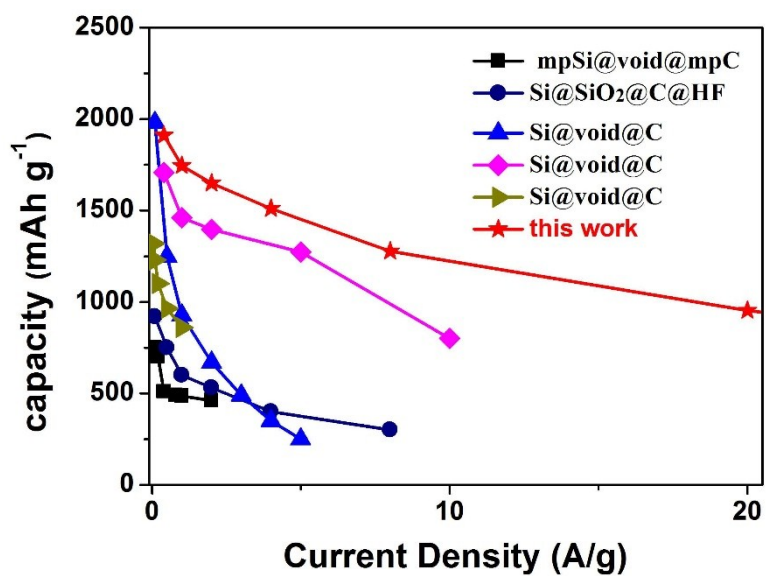

**Figure S9.** Comparison of capacity at different rates for Si@void@C composite electrode with those of Si/C yolk-shell nanocomposite anodes reported.<sup>[1-5]</sup>

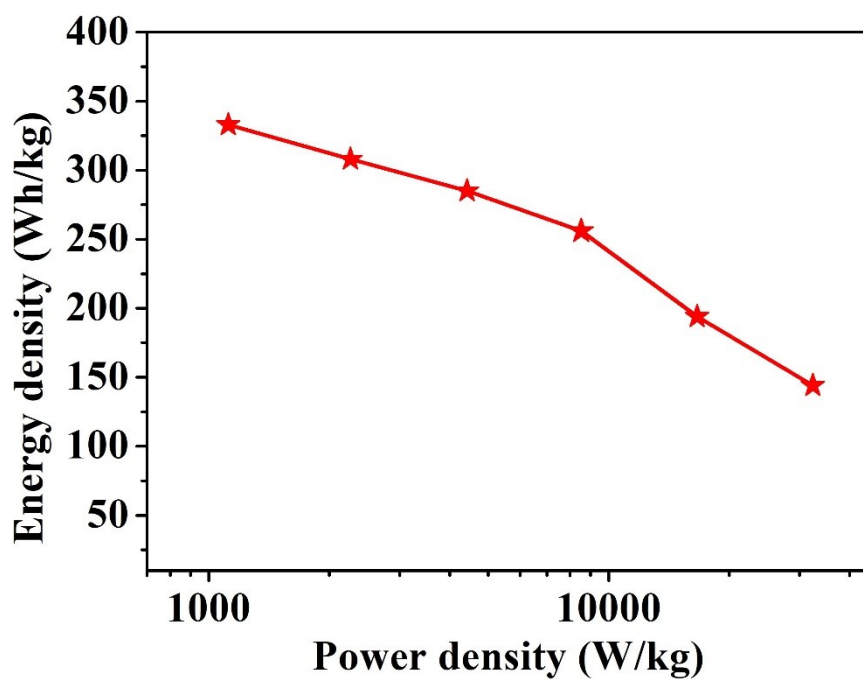

**Figure S10.** The energy and power density (based on the mass of RAC) of Li || RAC LIC .

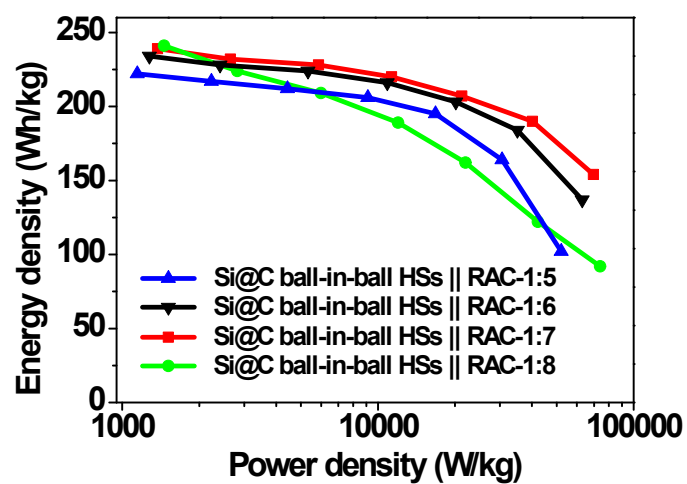

**Figure 11.** Ragone plot of LICs using Si@C ball-in-ball hollow spheres as anode and RAC as cathode with various mass ratios.



## References

- [1] L. Pan, H. Wang, D. Gao, S. Chen, L. Tan, L. Li, *Chemical Communications* 2014, 50, 5878.
- [2] L. Su, J. Xie, Y. Xu, L. Wang, Y. Wang, M. Ren, *Physical Chemistry Chemical Physics* 2015, 17, 17562.
- [3] Y. Ru, D. G. Evans, H. Zhu, W. Yang, *Rsc Advances* 2014, 4, 71.
- [4] X. Li, P. Meduri, X. Chen, W. Qi, M. H. Engelhard, W. Xu, F. Ding, J. Xiao, W. Wang, C. Wang, *Journal of Materials Chemistry* 2012, 22, 11014.
- [5] B. Li, R. Qi, J. Zai, F. Du, C. Xue, Y. Jin, C. Jin, Z. Ma, X. Qian, *Small* 2016, 12, 5281.
